# Supplementary material
Source: PubMed Central journal article supplement (PMC2776431)
Supplement: 0907425106_0907425106SI.pdf [file 0907425106_0907425106SI.pdf]

# Supporting Information

Rasch et al. 10.1073/pnas.0907425106

## SI Methods

**Genotyping.** The common *ADRA2B* variant consists of an in-frame deletion of three acidic residues. Specifically, glutamic acid residues 301–303 in the third intracellular loop of the receptor, which are part of a large glutamic acid stretch (glu12; amino acids 297–309), are absent in about 30% of Caucasians. This deletion is accompanied by such in vitro functional consequences as reduced receptor-mediated inhibition of adenylyl cyclase, greater EC<sub>50</sub>, and decreased agonist-promoted phosphorylation and receptor desensitization (1). DNA was extracted from saliva samples by using standard procedures. PCR products were stained with ethidium bromide and run on a 3% agarose gel. The forward primer, 5'-AGAAGGAGGGTGTGGTGGGG-3', and reverse primer, 5'-ACCTATAGCACCCACGC-CCT-3', were used, with an annealing temperature of 58 °C. Reactions were run in duplicate and rated by two blinded investigators.

**n-Back Test.** Between picture presentation and recall, participants performed on the 0- and 2-back versions of the n-back working memory task (2). In this task, letters are presented successively in the center of the screen. In the 0-back condition, subjects had to respond to the occurrence of the letter “x,” which is a baseline measure of general attention, concentration, and reaction time. The 2-back task requires subjects to respond to a letter repetition with one intervening letter (g – S – f – s). The latter condition required both the maintenance of the last two letters in memory and updating these remembered stimuli as each new stimulus was presented. The difference between the 2-back and the 0-back conditions represents a reliable measure of working memory and has been extensively used in behavioral as well as brain imaging experiments (3).

1. Small KM, Brown KM, Forbes SL, Liggett SB (2001) Polymorphic deletion of three intracellular acidic residues of the alpha 2B-adrenergic receptor decreases G protein-coupled receptor kinase-mediated phosphorylation and desensitization. *J Biol Chem* 276:4917–4922.
2. Gevins A, Cuttito B (1993) Spatiotemporal dynamics of component processes in human working memory. *Electroencephalogr Clin Neurophysiol* 87:128–143.
3. Owen AM, McMillan KM, Laird AR, Bullmore E (2005) N-back working memory paradigm: A meta-analysis of normative functional neuroimaging studies. *Hum Brain Mapp* 25:46–59.

**Table S1. Brain activity during encoding of negative vs. neutral pictures**

| Region                                | BA | No. of voxels | L/R | MNI coordinates |     |     | t(56) | Z    | P*        |
|---------------------------------------|----|---------------|-----|-----------------|-----|-----|-------|------|-----------|
|                                       |    |               |     | x               | y   | z   |       |      |           |
| <i>Negative &gt; neutral pictures</i> |    |               |     |                 |     |     |       |      |           |
| Amygdala                              |    | 30            | L   | -22             | -6  | -20 | 7.79  | 6.39 | 0.000 FWE |
|                                       |    | 12            | R   | 19              | 0   | -20 | 6.85  | 5.81 | 0.000 FWE |
| Occipital cortex/fusiform gyrus       | 19 | 4,545         | L   | -52             | -69 | 4   | 12.17 | Inf. | 0.000 FWE |
|                                       | 37 |               | R   | 44              | -52 | -16 | 11.38 | Inf. | 0.000 FWE |
| Postcentral gyrus                     | 2  | 141           | L   | -63             | -22 | 28  | 8.47  | 6.77 | 0.000 FWE |
|                                       | 2  | 109           | R   | 69              | -25 | 28  | 7.72  | 6.35 | 0.000 FWE |
| Superior temporal gyrus               | 38 | 292           | R   | 39              | 0   | -20 | 7.88  | 6.44 | 0.000 FWE |
| Amygdala/inferior frontal lobe/insula |    | 659           | L   | -22             | -6  | -20 | 7.79  | 6.39 | 0.000 FWE |
| Superior parietal lobule              | 7  | 82            | R   | 28              | -52 | 60  | 7.76  | 6.37 | 0.000 FWE |
| Medial frontal gyrus                  | 10 | 168           | L   | -6              | 52  | 20  | 7.65  | 6.30 | 0.000 FWE |
| Middle temporal gyrus                 | 21 | 45            | R   | 52              | -17 | -24 | 7.45  | 6.19 | 0.000 FWE |
| Cingulate gyrus                       | 24 | 50            | L   | -8              | -17 | 36  | 7.02  | 5.92 | 0.000 FWE |
| <i>Neutral &gt; negative pictures</i> |    |               |     |                 |     |     |       |      |           |
| No suprathreshold clusters            |    |               |     |                 |     |     |       |      |           |

L and R indicate left and right hemisphere, respectively.  
 \*P value after FWE correction for the whole-brain volume.

**Table S2. Brain activity during encoding of positive vs. neutral pictures**

| Region                                | BA | No. of voxels | L/R | MNI coordinates |     |     | t(56) | Z    | P*        |
|---------------------------------------|----|---------------|-----|-----------------|-----|-----|-------|------|-----------|
|                                       |    |               |     | x               | y   | z   |       |      |           |
| <i>Positive &gt; neutral pictures</i> |    |               |     |                 |     |     |       |      |           |
| Amygdala                              |    | 16            | L   | -19             | -3  | -16 | 4.00  | 3.74 | 0.005 SVC |
|                                       |    | 5             | R   | 19              | -3  | -20 | 3.64  | 3.44 | 0.013 SVC |
| Occipital lobe                        | 18 | 1,017         | L   | -14             | -72 | -4  | 12.67 | Inf. | 0.000 FWE |
| Middle temporal gyrus                 | 39 | 135           | L   | -52             | -72 | 8   | 8.22  | 6.63 | 0.000 FWE |
|                                       | 39 | 158           | R   | 52              | -69 | 8   | 7.74  | 6.36 | 0.000 FWE |
| Orbitofrontal gyrus                   | 11 | 46            | L   | -3              | 47  | -20 | 6.90  | 5.85 | 0.000 FWE |
| Medial frontal gyrus                  | 10 | 52            |     | 0               | 61  | 16  | 6.44  | 5.55 | 0.000 FWE |
| Anterior cingulate gyrus              | 32 | 99            | R   | 3               | 44  | 0   | 6.44  | 5.55 | 0.000 FWE |
| Inferior frontal gyrus                | 47 | 39            | L   | -33             | 19  | -20 | 6.24  | 5.41 | 0.000 FWE |
| <i>Neutral &gt; positive pictures</i> |    |               |     |                 |     |     |       |      |           |
| Fusiform gyrus                        | 37 | 112           | R   | 28              | -41 | -12 | 8.78  | 6.93 | 0.000 FWE |
| Superior occipital gyrus              | 19 | 28            | R   | 39              | -83 | 24  | 7.09  | 6.61 | 0.000 FWE |
| Parahippocampal gyrus                 | 36 | 38            | L   | -30             | -41 | -20 | 6.43  | 5.53 | 0.000 FWE |

L and R indicate left and right hemisphere, respectively.

\*P values with SVC are values after SVC for the bilateral amygdala. P values with FWE are values after FWE correction for the whole-brain volume.

**Table S3. Emotional subsequent memory effect for negative and positive pictures**

| Region                                                 | BA | No. of voxels | L/R | MNI coordinates |     |     | t(56) | Z    | P     |
|--------------------------------------------------------|----|---------------|-----|-----------------|-----|-----|-------|------|-------|
|                                                        |    |               |     | x               | y   | z   |       |      |       |
| <i>Dm<sub>negative</sub> &gt; Dm<sub>neutral</sub></i> |    |               |     |                 |     |     |       |      |       |
| Fusiform gyrus                                         | 37 | 21            | R   | 36              | -52 | -16 | 4.75  | 4.34 | 0.000 |
| Precentral gyrus                                       | 4  | 72            | R   | 58              | -22 | 40  | 4.62  | 4.23 | 0.000 |
| Inferior temporal gyrus                                | 37 | 50            | R   | 44              | -63 | 0   | 4.19  | 3.89 | 0.000 |
| Hippocampus/parahippocampus                            |    | 6             | L   | -14             | -17 | -24 | 4.18  | 3.88 | 0.000 |
| Middle occipital gyrus                                 | 19 | 12            | L   | -50             | -74 | -4  | 3.72  | 3.50 | 0.000 |
| Postcentral gyrus                                      | 3  | 6             | R   | 66              | -14 | 24  | 3.70  | 3.48 | 0.000 |
|                                                        | 3  | 6             | L   | -61             | -22 | 36  | 3.43  | 3.26 | 0.001 |
| Insula                                                 | 13 |               | L   | -33             | 19  | 12  | 3.26  | 3.10 | 0.001 |
| Amygdala                                               |    |               | R   | 19              | 0   | -20 | 2.61  | 2.52 | 0.006 |
| Deletion carriers only                                 |    |               | R   | 30              | 0   | -20 | 2.61  | 2.45 | 0.007 |
| Noncarriers only                                       |    |               | R   | 19              | 0   | -20 | 2.50  | 2.35 | 0.009 |
| <i>Dm<sub>positive</sub> &gt; Dm<sub>neutral</sub></i> |    |               |     |                 |     |     |       |      |       |
| Anterior hippocampus                                   |    |               | L   | -28             | -8  | -24 | 3.30  | 3.14 | 0.001 |
| Amygdala                                               |    |               | L   | -25             | -3  | -24 | 1.86  | 1.83 | 0.034 |
| Deletion carriers only                                 |    |               | L   | -25             | 3   | -20 | 2.44  | 2.31 | 0.010 |
| Noncarriers only                                       |    |               | L   | -19             | -3  | -24 | 1.33  | 1.32 | 0.093 |

Dm: remembered > forgotten pictures. L and R indicate left and right hemisphere, respectively.

**Table S4. Genotype-dependent ESM effect for negative and positive pictures**

| Region                                                                            | BA | No. of voxels | L/R | MNI coordinates |      |    | t(55) | Z    | P     |
|-----------------------------------------------------------------------------------|----|---------------|-----|-----------------|------|----|-------|------|-------|
|                                                                                   |    |               |     | x               | y    | z  |       |      |       |
| <i>Deletion &gt; no deletion for <math>Dm_{negative} &gt; Dm_{neutral}</math></i> |    |               |     |                 |      |    |       |      |       |
| Postcentral gyrus                                                                 | 43 | 3             | L   | -52             | -11  | 16 | 3.49  | 3.30 | 0.000 |
| Insula                                                                            | 13 |               | L   | -44             | -6   | 12 | 3.00  | 2.87 | 0.002 |
| <i>No deletion &gt; deletion for <math>Dm_{negative} &gt; Dm_{neutral}</math></i> |    |               |     |                 |      |    |       |      |       |
| Occipital lobe                                                                    | 18 | 6             | L   | -19             | -102 | -8 | 3.70  | 3.48 | 0.000 |
| <i>Deletion &gt; no deletion for <math>Dm_{positive} &gt; Dm_{neutral}</math></i> |    |               |     |                 |      |    |       |      |       |
| Insula                                                                            | 13 | 16            | L   | -47             | -6   | 16 | 4.02  | 3.75 | 0.000 |
| <i>No deletion &gt; deletion for <math>Dm_{positive} &gt; Dm_{neutral}</math></i> |    |               |     |                 |      |    |       |      |       |
| No suprathreshold voxels                                                          |    |               |     |                 |      |    |       |      |       |

Dm: remembered > forgotten pictures. L and R indicate left and right hemisphere, respectively.
